# Supplementary material for: Remdesivir in Patients With Severe Kidney Dysfunction: A Secondary Analysis of the CATCO Randomized Trial
Source: PubMed Central journal article supplement (PMC9425145; doi:10.1001/jamanetworkopen.2022.29236), 2022-08-29

## Supplementary Online Content

Cheng M, Fowler R, Murthy S, Pinto R, Sheehan NL, Tseng A. Remdesivir in patients with severe kidney dysfunction: a secondary analysis of the CATCO randomized trial. *JAMA Netw Open*. 2022;5(8):e2229236. doi:10.1001/jamanetworkopen.2022.29236

### **eFigure.** Randomization of Participants

This supplementary material has been provided by the authors to give readers additional information about their work.

**eFigure. Randomization of Participants**

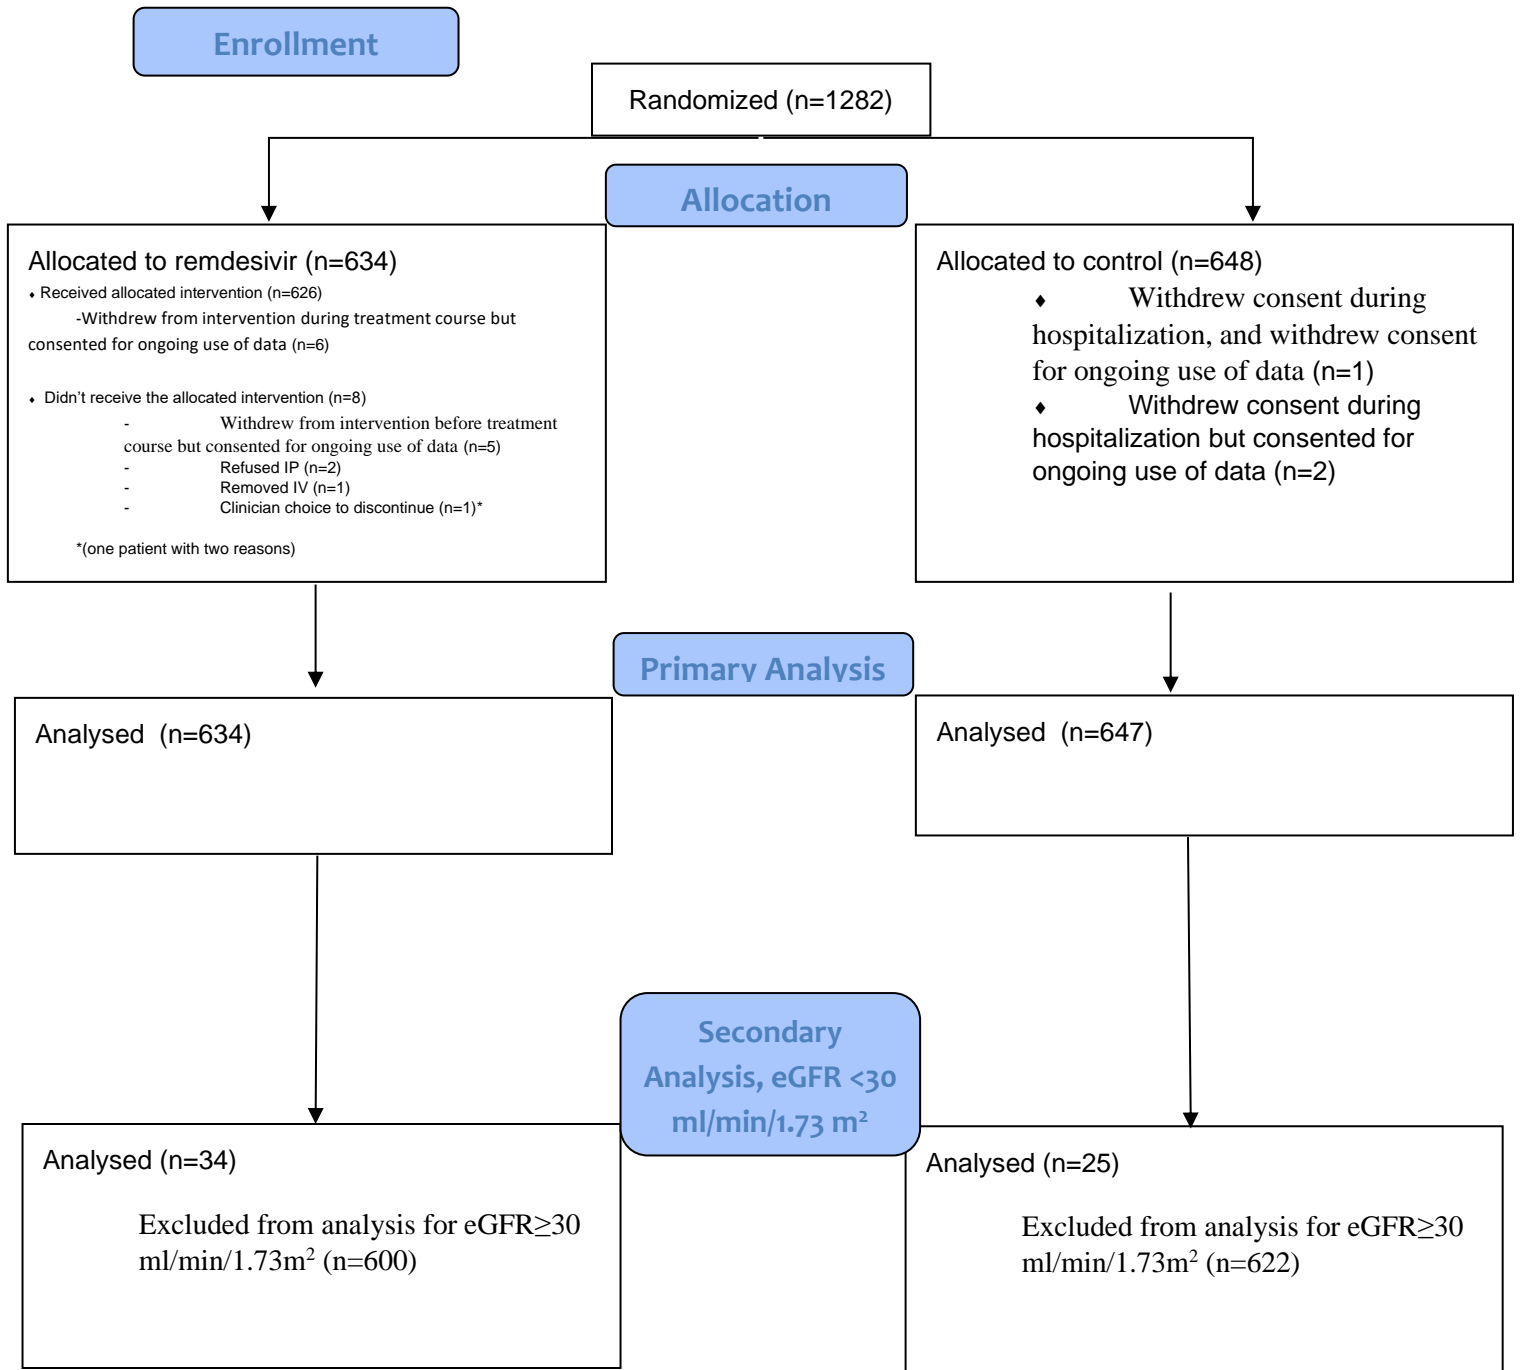

Supplement: jamanetwopen-e2229236-s001.pdf [file jamanetwopen-e2229236-s001.pdf]
