# Supplementary material for: Remdesivir in Patients With Severe Kidney Dysfunction: A Secondary Analysis of the CATCO Randomized Trial
Source: PubMed Central journal article supplement (PMC9425145; doi:10.1001/jamanetworkopen.2022.29236), 2022-08-29
Supplement: jamanetwopen-e2229236-s003.pdf [file jamanetwopen-e2229236-s003.pdf]

## Data Sharing Statement

Cheng. Remdesivir in Patients With Severe Kidney Dysfunction. *JAMA Netw Open*. Published August 29, 2022. doi:10.1001/jamanetworkopen.2022.29236

### Data

**Data available:** Yes

**Data types:** Deidentified participant data, Data dictionary

**How to access data:** [catco@sunnybrook.ca](mailto:catco@sunnybrook.ca)

**When available:** beginning date: 01-01-2023

### Supporting Documents

**Document types:** None

### Additional Information

**Who can access the data:** Researchers whose proposed use of the data has been approved

**Types of analyses:** For any purpose

**Mechanisms of data availability:** Without investigator support, will be available on clinical trial data repository
